# Supplementary material for: Bringing Critical Race Praxis Into the Study of Electrophysiological Substrate of Sudden Cardiac Death: The ARIC Study
Source: PubMed Central journal article supplement — J Am Heart Assoc. 2020 Jan 30;9(3):e015012. doi: 10.1161/JAHA.119.015012 (PMC7033892; doi:10.1161/jaha.119.015012), 2020-01-30

# **SUPPLEMENTAL MATERIAL**

**Table S1. Race interaction in association of global ECG measures with SCD in Cox models.**

| Predictor, per 1 SD |                    | All (n=14,408; 522 SCDs) |                                     |                          |                 |
|---------------------|--------------------|--------------------------|-------------------------------------|--------------------------|-----------------|
|                     | HR(95%CI)          | P-value                  | RHR for black vs. white pts (95%CI) | P <sub>interaction</sub> |                 |
| Model 1             | Peak QRS-T angle   | <b>1.34(1.22-1.47)</b>   | <b>&lt;0.0001</b>                   | <b>0.86(0.75-0.98)</b>   | <b>0.026</b>    |
|                     | Area QRS-T angle   | <b>1.35(1.21-1.51)</b>   | <b>&lt;0.0001</b>                   | <b>0.78(0.67-0.90)</b>   | <b>0.001</b>    |
|                     | Peak SVG elevation | <b>1.13(1.01-1.26)</b>   | <b>0.027</b>                        | 0.92(0.78-1.09)          | 0.348           |
|                     | Area SVG elevation | <b>1.16(1.06-1.28)</b>   | <b>0.002</b>                        | 0.88(0.75-1.04)          | 0.136           |
|                     | Peak SVG azimuth   | <b>1.11(1.01-1.21)</b>   | <b>0.026</b>                        | 1.01(0.88-1.15)          | 0.940           |
|                     | Area SVG azimuth   | 0.99(0.90-1.09)          | 0.878                               | 1.07(0.92-1.25)          | 0.389           |
|                     | Peak SVG magnitude | 0.89(0.79-1.01)          | 0.083                               | 1.17(0.98-1.40)          | 0.083           |
|                     | Area SVG magnitude | 0.98(0.86-1.11)          | 0.753                               | 1.09(0.92-1.29)          | 0.314           |
|                     | SAI QRST           | <b>1.21(1.08-1.35)</b>   | <b>0.001</b>                        | 0.89(0.79-1.01)          | 0.078           |
|                     | Heart rate         | 1.11(0.99-1.24)          | 0.081                               | 1.01(0.86-1.19)          | 0.907           |
|                     | Bazett's QTc       | <b>1.12(1.01-1.24)</b>   | <b>0.032</b>                        | 1.01(0.89-1.14)          | 0.924           |
|                     | QRS duration       | 1.07(0.98-1.18)          | 0.128                               | 0.93(0.81-1.07)          | 0.304           |
|                     | Cornell voltage    | 1.10(0.98-1.24)          | 0.104                               | 1.01(0.87-1.18)          | 0.893           |
|                     | Model 2            | Peak QRS-T angle         | <b>1.24(1.12-1.36)</b>              | <b>&lt;0.0001</b>        | 0.89(0.77-1.03) |
| Area QRS-T angle    |                    | <b>1.27(1.15-1.40)</b>   | <b>&lt;0.0001</b>                   | <b>0.83(0.72-0.97)</b>   | <b>0.020</b>    |
| Peak SVG elevation  |                    | <b>1.14(1.03-1.27)</b>   | <b>0.011</b>                        | 0.96(0.81-1.15)          | 0.675           |
| Area SVG elevation  |                    | <b>1.12(1.01-1.23)</b>   | <b>0.035</b>                        | 0.97(0.81-1.16)          | 0.726           |
| Peak SVG azimuth    |                    | <b>1.12(1.02-1.22)#</b>  | <b>0.015</b>                        | 1.04(0.90-1.21)          | 0.602           |
| Area SVG azimuth    |                    | 1.04(0.95-1.15)          | 0.387                               | 1.11(0.93-1.32)          | 0.246           |
| Peak SVG magnitude  |                    | 0.98(0.86-1.11)          | 0.720                               | <b>1.19(1.001-1.41)</b>  | <b>0.048</b>    |
| Area SVG magnitude  |                    | 0.93(0.82-1.07)          | 0.310                               | <b>1.24(1.04-1.66)</b>   | <b>0.018</b>    |
| SAI QRST            |                    | <b>1.10(1.02-1.19)</b>   | <b>0.013</b>                        | 1.01(0.91-1.12)          | 0.865           |
| Heart rate          |                    | 1.11(0.99-1.24)          | 0.078                               | 1.04(0.89-1.23)          | 0.600           |
| Bazett's QTc        |                    | <b>1.16(1.06-1.27)#</b>  | <b>0.002</b>                        | 1.01(0.88-1.15)          | 0.916           |
| QRS duration        |                    | <b>1.18(1.09-1.29)</b>   | <b>&lt;0.0001</b>                   | 0.96(0.84-1.10)          | 0.575           |
| Cornell voltage     |                    | 1.06(0.97-1.16)          | 0.187                               | 1.09(0.97-1.23)          | 0.135           |

#Proportionality hazards assumption not met; SVG=spatial ventricular gradient; RHR=relative hazard ratio.

**Table S2. Association of GEH with SCD in Cox models for white and black.**

| Predictor, per 1 SD | White (n=10,669; 309 SCDs) |                         | Black (n=3,739; 213 SCDs) |                         |                 |
|---------------------|----------------------------|-------------------------|---------------------------|-------------------------|-----------------|
|                     | HR(95%CI)                  | P-value                 | HR(95%CI)                 | P-value                 |                 |
| Model 1             | Peak QRS-T angle           | <b>1.34(1.21-1.48)</b>  | <b>&lt;0.0001</b>         | <b>1.15(1.02-1.30)</b>  | <b>0.018</b>    |
|                     | Area QRS-T angle           | <b>1.38(1.22-1.55)</b>  | <b>&lt;0.0001</b>         | 1.05(0.91-1.22)         | 0.467           |
|                     | Peak SVG elevation         | <b>1.13(1.01-1.27)</b>  | <b>0.032</b>              | 1.05(0.90-1.23)         | 0.523           |
|                     | Area SVG elevation         | <b>1.17(1.06-1.30)</b>  | <b>0.002</b>              | 1.05(0.90-1.21)         | 0.555           |
|                     | Peak SVG azimuth           | <b>1.10(1.003-1.21)</b> | <b>0.044</b>              | 1.10(0.97-1.26)         | 0.129           |
|                     | Area SVG azimuth           | 0.99(0.90-1.10)         | 0.901                     | 1.05(0.91-1.22)         | 0.471           |
|                     | Peak SVG magnitude         | 0.92(0.81-1.04)         | 0.198                     | 1.01(0.88-1.15)         | 0.915           |
|                     | Area SVG magnitude         | 1.01(0.88-1.15)         | 0.935                     | 1.03(0.90-1.18)         | 0.625           |
|                     | SAI QRST                   | <b>1.23(1.08-1.39)</b>  | <b>0.001</b>              | 1.07(0.95-1.21)         | 0.270           |
|                     | Heart rate                 | 1.11(0.98-1.26)         | 0.090                     | <b>1.16(1.02-1.32)</b>  | <b>0.029</b>    |
|                     | Bazett's QTc               | <b>1.18(1.03-1.29)</b>  | <b>0.010</b>              | <b>1.11(1.002-1.23)</b> | <b>0.046</b>    |
|                     | QRS duration               | 1.06(0.95-1.18)         | 0.272                     | 1.04(0.92-1.18)         | 0.510           |
|                     | Cornell voltage            | 1.07(0.95-1.22)         | 0.256                     | <b>1.15(1.02-1.30)</b>  | <b>0.018</b>    |
|                     | Model 2                    | Peak QRS-T angle        | <b>1.23(1.12-1.36)</b>    | <b>&lt;0.0001</b>       | 1.09(0.96-1.24) |
| Area QRS-T angle    |                            | <b>1.27(1.15-1.41)</b>  | <b>&lt;0.0001</b>         | 1.06(0.93-1.22)         | 0.373           |
| Peak SVG elevation  |                            | <b>1.16(1.04-1.29)</b>  | <b>0.006</b>              | 1.12(0.96-1.30)         | 0.147           |
| Area SVG elevation  |                            | <b>1.13(1.02-1.25)</b>  | <b>0.021</b>              | 1.09(0.94-1.28)         | 0.251           |
| Peak SVG azimuth    |                            | <b>1.11(1.01-1.21)</b>  | <b>0.022</b>              | <b>1.16(1.02-1.32)</b>  | <b>0.023</b>    |
| Area SVG azimuth    |                            | <b>1.05(0.95-1.16)</b>  | <b>0.359</b>              | 1.15(0.99-1.34) #       | 0.074           |
| Peak SVG magnitude  |                            | 0.96(0.84-1.10)         | 0.595                     | 1.08(0.95-1.23)         | 0.236           |
| Area SVG magnitude  |                            | 1.00(0.88-1.14)         | 0.964                     | 1.09(0.96-1.24)         | 0.183           |
| SAI QRST            |                            | <b>1.13(1.04-1.22)</b>  | <b>0.004</b>              | <b>1.11(1.01-1.21)</b>  | <b>0.023</b>    |
| Heart rate          |                            | 1.09(0.97-1.23)         | 0.134                     | <b>1.20(1.06-1.36)</b>  | <b>0.005</b>    |
| Bazett's QTc        |                            | <b>1.19(1.09-1.30)</b>  | <b>&lt;0.0001</b>         | <b>1.16(1.05-1.29)</b>  | <b>0.004</b>    |
| QRS duration        |                            | <b>1.18(1.08-1.29)</b>  | <b>&lt;0.0001</b>         | <b>1.15(1.03-1.30)</b>  | <b>0.015</b>    |
| Cornell voltage     |                            | 1.08(0.99-1.19)         | 0.082                     | <b>1.16(1.06-1.27)</b>  | <b>0.001</b>    |

#Proportionality hazards assumption not met; SVG=spatial ventricular gradient.

**Table S3. Race interaction in association of GEH with SCD and nonSCD in competing risk models.**

| Predictor, per 1 SD | SCD (n=14,408; 522 SCDs) |                   |                                  |                          | nonSCD (n=14,408; 2,147 nonSCDs) |                   |                                  |                          |
|---------------------|--------------------------|-------------------|----------------------------------|--------------------------|----------------------------------|-------------------|----------------------------------|--------------------------|
|                     | SHR(95% CI)              | P-value           | RSHR for black vs.white (95% CI) | P <sub>interaction</sub> | SHR(95% CI)                      | P-value           | RSHR for black vs.white (95% CI) | P <sub>interaction</sub> |
| Model 1             |                          |                   |                                  |                          |                                  |                   |                                  |                          |
| Peak QRS-T angle    | <b>1.28(1.16-1.40)</b>   | <b>&lt;0.0001</b> | <b>0.85(0.75-0.98)</b>           | <b>0.022</b>             | <b>1.11(1.05-1.17)</b>           | <b>&lt;0.0001</b> | 1.01(0.93-1.09)                  | 0.979                    |
| Area QRS-T angle    | <b>1.25(1.13-1.39)</b>   | <b>&lt;0.0001</b> | <b>0.79(0.69-0.92)</b>           | <b>0.002</b>             | <b>1.15(1.08-1.22)</b>           | <b>&lt;0.0001</b> | 1.00(0.91-1.09)                  | 0.914                    |
| Peak SVG elevation  | 1.11(0.99-1.25)          | 0.075             | 0.96(0.80-1.14)                  | 0.630                    | 1.00(0.95-1.06)                  | 0.869             | 0.930(0.84-1.03)                 | 0.148                    |
| Area SVG elevation  | <b>1.14(1.03-1.25)</b>   | <b>0.010</b>      | 0.94(0.80-1.11)                  | 0.471                    | 1.00(0.94-1.05)                  | 0.904             | 0.96(0.87-1.05)                  | 0.398                    |
| Peak SVG azimuth    | 1.09(0.99-1.19)          | 0.071             | 1.02(0.89-1.18)                  | 0.755                    | 1.04(0.99-1.09)                  | 0.168             | 0.99(0.91-1.09)                  | 0.890                    |
| Area SVG azimuth    | 0.98(0.88-1.08)          | 0.640             | 1.07(0.91-1.64)                  | 0.426                    | <b>1.07(1.01-1.13)</b>           | <b>0.017</b>      | 0.99(0.90-1.09)                  | 0.837                    |
| Peak SVG magnitude  | 0.90(0.79-1.02)          | 0.096             | 1.10(0.93-1.31)                  | 0.263                    | 0.96(0.90-1.02)                  | 0.170             | 1.10(0.99-1.21)                  | 0.073                    |
| Area SVG magnitude  | 0.98(0.87-1.11)          | 0.727             | 1.02(0.87-1.21)                  | 0.792                    | 0.98(0.92-1.05)                  | 0.608             | 1.08(0.98-1.19)                  | 0.114                    |
| SAI QRST            | <b>1.13(1.02-1.26)</b>   | <b>0.019</b>      | 0.88(0.77-1.01)                  | 0.076                    | 1.05(0.98-1.13)                  | 0.192             | 1.01(0.93-1.10)                  | 0.751                    |
| Heart rate.         | 1.03(0.92-1.16)          | 0.576             | 0.99(0.84-1.17)                  | 0.918                    | <b>1.13(1.07-1.20)</b>           | <b>&lt;0.0001</b> | 1.07(0.98-1.17)                  | 0.128                    |
| Bazett's QTc        | 1.09(0.98-1.21)          | 0.124             | 1.02(0.90-1.17)                  | 0.737                    | 1.05(0.996-1.11)                 | 0.071             | 1.02(0.94-1.09)                  | 0.673                    |
| QRS duration        | 1.06(0.95-1.17)          | 0.293             | 0.92(0.78-1.07)                  | 0.267                    | 1.05(0.996-1.11)                 | 0.069             | 0.98(0.90-1.06)                  | 0.608                    |
| Cornell voltage     | 1.08(0.96-1.22)          | 0.185             | 0.98(0.84-1.15)                  | 0.815                    | <b>1.12(1.05-1.20)</b>           | <b>0.001</b>      | 0.97(0.89-1.07)                  | 0.543                    |
| Model 2             |                          |                   |                                  |                          |                                  |                   |                                  |                          |
| Peak QRS-T angle    | <b>1.21(1.10-1.33)</b>   | <b>&lt;0.0001</b> | 0.89(0.76-1.04)                  | 0.130                    | <b>0.93(0.87-0.98)</b>           | <b>0.010</b>      | 1.02(0.93-1.12)                  | 0.706                    |
| Area QRS-T angle    | <b>1.26(1.13-1.41)</b>   | <b>&lt;0.0001</b> | <b>0.82(0.69-0.96)</b>           | <b>0.017</b>             | <b>0.92(0.87-0.97)</b>           | <b>0.004</b>      | 1.02(0.92-1.13)                  | 0.656                    |
| Peak SVG elevation  | <b>1.16(1.04-1.29)</b>   | <b>0.007</b>      | 0.96(0.80-1.15)                  | 0.649                    | <b>0.92(0.86-0.98)</b>           | <b>0.006</b>      | 1.07(0.95-1.21)                  | 0.281                    |
| Area SVG elevation  | <b>1.11(1.005-1.24)</b>  | <b>0.041</b>      | 0.98(0.82-1.17)                  | 0.849                    | <b>0.93(0.88-0.99)</b>           | <b>0.031</b>      | 1.05(0.93-1.18)                  | 0.418                    |
| Peak SVG azimuth    | <b>1.11(1.01-1.22)</b>   | <b>0.033</b>      | 1.04(0.88-1.23)                  | 0.651                    | <b>0.95(0.90-0.999)</b>          | <b>0.044</b>      | 1.01(0.91-1.12)                  | 0.887                    |
| Area SVG azimuth    | 1.04(0.93-1.16)          | 0.458             | 1.10(0.89-1.81)                  | 0.360                    | 0.96(0.91-1.02)                  | 0.171             | 0.97(0.87-1.07)                  | 0.549                    |
| Peak SVG magnitude  | 0.91(0.79-1.04)          | 0.180             | 1.20(0.99-1.44)                  | 0.058                    | 1.04(0.97-1.12)                  | 0.273             | 0.94(0.84-1.05)                  | 0.248                    |
| Area SVG magnitude  | 0.99(0.83-1.08)          | 0.425             | 1.14(0.96-1.37)                  | 0.144                    | 1.04(0.97-1.12)                  | 0.273             | 0.93(0.83-1.03)                  | 0.179                    |
| SAI QRST            | <b>1.10(1.02-1.19)</b>   | <b>0.011</b>      | 0.99(0.87-1.12)                  | 0.831                    | 0.95(0.90-1.01)                  | 0.083             | 0.97(0.89-1.05)                  | 0.447                    |
| Heart rate.         | 1.03(0.92-1.15)          | 0.589             | 1.05(0.88-1.25)                  | 0.583                    | <b>1.11(1.04-1.18)</b>           | <b>0.001</b>      | 0.97(0.88-1.08)                  | 0.590                    |
| Bazett's QTc        | <b>1.13(1.03-1.24)</b>   | <b>0.009</b>      | 1.02(0.89-1.16)                  | 0.792                    | 1.02(0.97-1.09)                  | 0.413             | 0.96(0.88-1.06)                  | 0.418                    |
| QRS duration        | <b>1.20(1.10-1.30)</b>   | <b>&lt;0.0001</b> | 0.96(0.83-1.10)                  | 0.530                    | <b>0.92(0.87-0.97)</b>           | <b>0.002</b>      | 0.98(0.89-1.08)                  | 0.713                    |
| Cornell voltage     | 1.05(0.96-1.15)          | 0.257             | 1.09(0.96-1.24)                  | 0.204                    | 0.97(0.92-1.02)                  | 0.187             | 1.00(0.92-1.08)                  | 0.937                    |

RSHR=relative sub-hazard ratio

**Table S4. Competing risks of sudden cardiac death and non-sudden cardiovascular death for white and black.**

| Predictor, per 1 SD | Sudden cardiac death      |                         |                           |                        | Non-sudden cardiac death  |                        |                           |                         |                   |
|---------------------|---------------------------|-------------------------|---------------------------|------------------------|---------------------------|------------------------|---------------------------|-------------------------|-------------------|
|                     | White (n=10,669;309 SCDs) |                         | Black (n=3,739; 213 SCDs) |                        | White (n=10,669;309 SCDs) |                        | Black (n=3,739; 213 SCDs) |                         |                   |
|                     | SHR(95%CI)                | P-value                 | SHR(95%CI)                | P-value                | SHR(95%CI)                | P-value                | SHR(95%CI)                | P-value                 |                   |
| Model 1             | Peak QRS-T angle          | <b>1.27(1.15-1.40)</b>  | <b>&lt;0.0001</b>         | 1.09(0.96-1.24)        | 0.167                     | <b>1.10(1.04-1.16)</b> | <b>0.002</b>              | <b>1.15(1.07-1.23)</b>  | <b>&lt;0.0001</b> |
|                     | Area QRS-T angle          | <b>1.26(1.12-1.42)</b>  | <b>&lt;0.0001</b>         | 1.00(0.87-1.15)        | 0.975                     | <b>1.14(1.07-1.21)</b> | <b>&lt;0.0001</b>         | <b>1.19(1.09-1.29)</b>  | <b>&lt;0.0001</b> |
|                     | Peak SVG elevation        | 1.10(0.97-1.26)         | 0.130                     | 1.09(0.93-1.29)        | 0.293                     | 0.99(0.93-1.05)        | 0.783                     | 0.96(0.87-1.06)         | 0.403             |
|                     | Area SVG elevation        | <b>1.15(1.04-1.27)</b>  | <b>0.008</b>              | 1.09(0.94-1.27)        | 0.257                     | 0.98(0.93-1.04)        | 0.559                     | 1.00(0.92-1.09)         | 0.959             |
|                     | Peak SVG azimuth          | 1.08(0.98-1.19)         | 0.116                     | 1.12(0.98-1.28)        | 0.095                     | 1.04(0.99-1.10)        | 0.137                     | 1.01(0.93-1.11)         | 0.746             |
|                     | Area SVG azimuth          | 0.97(0.87-1.08)         | 0.594                     | 1.04(0.89-1.22)        | 0.625                     | <b>1.08(1.02-1.14)</b> | <b>0.013</b>              | 1.05(0.97-1.15)         | 0.220             |
|                     | Peak SVG magnitude        | 0.92(0.81-1.05)         | 0.229                     | 0.97(0.85-1.11)        | 0.636                     | 0.97(0.91-1.04)        | 0.362                     | 1.03(0.96-1.12)         | 0.344             |
|                     | Area SVG magnitude        | 1.01(0.89-1.14)         | 0.933                     | 0.98(0.86-1.13)        | 0.823                     | 0.99(0.93-1.07)        | 0.885                     | 1.06(0.98-1.15)         | 0.122             |
|                     | SAI QRST                  | <b>1.16(1.03-1.31)</b>  | <b>0.012</b>              | 1.00(0.88-1.15)        | 0.953                     | 1.04(0.96-1.12)        | 0.325                     | <b>1.11(1.03-1.20)</b>  | <b>0.010</b>      |
|                     | Heart rate.               | 1.05(0.93-1.19)         | 0.450                     | 1.04(0.91-1.19)        | 0.526                     | <b>1.14(1.08-1.21)</b> | <b>&lt;0.0001</b>         | <b>1.19(1.10-1.28)</b>  | <b>&lt;0.0001</b> |
|                     | Bazett's QTc              | 1.11(0.99-1.25)         | 0.069                     | 1.10(0.99-1.22)        | 0.066                     | <b>1.06(1.00-1.12)</b> | <b>0.037</b>              | 1.05(0.98-1.12)         | 0.180             |
|                     | QRS duration              | 1.05(0.94-1.17)         | 0.420                     | 1.01(0.88-1.16)        | 0.880                     | 1.03(0.97-1.09)        | 0.371                     | 1.07(0.99-1.16)         | 0.085             |
|                     | Cornell voltage           | 1.05(0.93-1.19)         | 0.460                     | 1.09(0.97-1.23)        | 0.140                     | <b>1.12(1.04-1.20)</b> | <b>0.002</b>              | <b>1.11(1.03-1.06)</b>  | <b>0.006</b>      |
|                     | Model 2                   | Peak QRS-T angle        | <b>1.21(1.09-1.33)</b>    | <b>&lt;0.0001</b>      | 1.07(0.93-1.24)           | 0.340                  | <b>0.93(0.87-0.98)</b>    | <b>0.014</b>            | 0.94(0.86-1.02)   |
| Area QRS-T angle    |                           | <b>1.26(1.13-1.41)</b>  | <b>&lt;0.0001</b>         | 1.04(0.89-1.20)        | 0.644                     | <b>0.92(0.87-0.98)</b> | <b>0.008</b>              | 0.92(0.84-1.02)         | 0.115             |
| Peak SVG elevation  |                           | <b>1.17(1.05-1.30)</b>  | <b>0.005</b>              | 1.12(0.95-1.32)        | 0.195                     | <b>0.91(0.85-0.97)</b> | <b>0.003</b>              | 1.01(0.91-1.13)         | 0.793             |
| Area SVG elevation  |                           | <b>1.13(1.02-1.26)</b>  | <b>0.020</b>              | 1.10(0.94-1.30)        | 0.243                     | <b>0.93(0.87-0.99)</b> | <b>0.032</b>              | 1.01(0.91-1.12)         | 0.812             |
| Peak SVG azimuth    |                           | <b>1.10(1.004-1.22)</b> | <b>0.042</b>              | 1.16(0.99-1.35)        | 0.068                     | 0.95(0.90-1.00)        | 0.061                     | 0.94(0.85-1.04)         | 0.254             |
| Area SVG azimuth    |                           | 1.04(0.93-1.16)         | 0.453                     | 1.14(0.95-1.38)        | 0.169                     | 0.97(0.92-1.02)        | 0.229                     | <b>0.91(0.82-0.998)</b> | <b>0.046</b>      |
| Peak SVG magnitude  |                           | 0.95(0.83-1.09)         | 0.455                     | 1.04(0.91-1.19)        | 0.541                     | 1.04(0.97-1.23)        | 0.262                     | 0.96(0.88-1.04)         | 0.336             |
| Area SVG magnitude  |                           | 0.98(0.86-1.12)         | 0.791                     | 1.05(0.91-1.21)        | 0.530                     | 1.04(0.97-1.12)        | 0.245                     | 0.95(0.87-1.03)         | 0.222             |
| SAI QRST            |                           | <b>1.11(1.03-1.20)</b>  | <b>0.007</b>              | 1.09(0.97-1.23)        | 0.148                     | 0.95(0.90-1.01)        | 0.079                     | <b>0.92(0.86-0.99)</b>  | <b>0.018</b>      |
| Heart rate          |                           | 1.03(0.92-1.16)         | 0.630                     | 1.12(0.97-1.30)        | 0.114                     | <b>1.12(1.06-1.19)</b> | <b>&lt;0.0001</b>         | 1.06(0.98-1.16)         | 0.158             |
| Bazett's QTc        |                           | <b>1.15(1.05-1.27)</b>  | <b>0.003</b>              | <b>1.15(1.03-1.28)</b> | <b>0.011</b>              | 1.02(0.97-1.08)        | 0.439                     | 1.02(0.93-1.08)         | 0.953             |
| QRS duration        |                           | <b>1.19(1.09-1.30)</b>  | <b>&lt;0.0001</b>         | <b>1.16(1.02-1.31)</b> | <b>0.019</b>              | <b>0.91(0.86-0.96)</b> | <b>0.001</b>              | 0.92(0.84-1.002)        | 0.056             |
| Cornell voltage     |                           | 1.07(0.97-1.17)         | 0.159                     | <b>1.14(1.03-1.27)</b> | <b>0.015</b>              | 0.97(0.92-1.02)        | 0.182                     | 0.96(0.89-1.03)         | 0.224             |

**Table S5. Two-way interactions in association of global ECG measures with SCD in Cox**

**models: race-hypertension; race-coronary heart disease, and race-BMI category.**

| Predictor,<br>per 1 SD | Subgroup                  | Cox model 1             |                          | Cox model 2            |                          |
|------------------------|---------------------------|-------------------------|--------------------------|------------------------|--------------------------|
|                        |                           | RHR(95%CI)              | P <sub>interaction</sub> | RHR (95%CI)            | P <sub>interaction</sub> |
| Peak QRS-T angle       | White HTN-free(161/7623)  | Reference (1.00)        |                          | Reference (1.00)       |                          |
|                        | Black HTN-free(46/1616)   | 0.87(0.66-1.14)         | 0.304                    | 0.83(0.62-1.12)        | 0.229                    |
|                        | White HTN(148/2737)       | 0.94(0.79-1.12)         | 0.507                    | 0.88(0.74-1.06)        | 0.170                    |
|                        | Black HTN(167/1910)       | <b>0.82(0.70-0.97)</b>  | <b>0.021</b>             | <b>0.82(0.69-0.98)</b> | <b>0.029</b>             |
| Area QRS-T angle       | White HTN-free(161/7623)  | Reference (1.00)        |                          | Reference (1.00)       |                          |
|                        | Black HTN-free(46/1616)   | 1.04(0.71-1.53)         | 0.681                    | 0.93(0.68-1.26)        | 0.631                    |
|                        | White HTN(148/2737)       | 0.93(0.77-1.13)#        | 0.458                    | 0.92(0.76-1.10)        | 0.359                    |
|                        | Black HTN(167/1910)       | <b>0.71(0.59-0.86)</b>  | <b>&lt;0.0001</b>        | <b>0.76(0.62-0.91)</b> | <b>0.004</b>             |
| Peak SVG magnitude     | White HTN-free(161/7623)  | Reference (1.00)        |                          | Reference (1.00)       |                          |
|                        | Black HTN-free(46/1616)   | <b>1.44(1.04-2.01)</b>  | <b>0.030</b>             | <b>1.49(1.08-2.05)</b> | <b>0.014</b>             |
|                        | White HTN(148/2737)       | 1.26(0.98-1.61)#        | 0.066                    | 1.18(0.91-1.54)        | 0.203                    |
|                        | Black HTN(167/1910)       | <b>1.32(1.05-1.65)</b>  | <b>0.016</b>             | <b>1.30(1.03-1.63)</b> | <b>0.026</b>             |
| SVG magnitude          | White HTN-free(161/7623)  | Reference (1.00)        |                          | Reference (1.00)       |                          |
|                        | Black HTN-free(46/1616)   | 1.35(0.98-1.85)         | 0.070                    | <b>1.41(1.03-1.92)</b> | <b>0.031</b>             |
|                        | White HTN(148/2737)       | 1.28(0.99-1.64)#        | 0.055                    | 1.17(0.91-1.51)        | 0.218                    |
|                        | Black HTN(167/1910)       | 1.25(0.999-1.56)        | 0.051                    | 1.25(0.999-1.56)       | 0.051                    |
| SAI QRST               | White HTN-free(161/7623)  | Reference (1.00)        |                          | Reference (1.00)       |                          |
|                        | Black HTN-free(46/1616)   | 1.19(0.88-1.61)         | 0.254                    | 1.19(0.91-1.57)        | 0.204                    |
|                        | White HTN(148/2737)       | 1.16(0.95-1.41)         | 0.140                    | 0.997(0.85-1.17)       | 0.996                    |
|                        | Black HTN(167/1910)       | 0.95(0.80-1.14)         | 0.580                    | 0.98(0.85-1.14)        | 0.821                    |
| Cornell voltage        | White HTN-free(161/7623)  | Reference (1.00)        |                          | Reference (1.00)       |                          |
|                        | Black HTN-free(46/1616)   | 0.95(0.68-1.32)         | 0.748                    | 0.95(0.69-1.33)        | 0.781                    |
|                        | White HTN(148/2737)       | 1.08(0.86-1.36)         | 0.514                    | 1.02(0.85-1.22)        | 0.812                    |
|                        | Black HTN(167/1910)       | 1.04(0.84-1.28)         | 0.712                    | 1.11(0.95-1.31)        | 0.200                    |
| Peak QRS-T angle       | White CHD-free(221/10135) | Reference (1.00)        |                          | Reference (1.00)       |                          |
|                        | Black CHD-free(184/3591)  | 0.98(0.84-1.15)         | 0.823                    | 0.96(0.82-1.13)        | 0.640                    |
|                        | White CHD(88/534)         | 1.18(0.97-1.43)         | 0.100                    | 1.12(0.91-1.40)        | 0.286                    |
|                        | Black CHD(29/148)         | 0.98(0.84-1.15)         | 0.823                    | 0.82(0.57-1.17)        | 0.270                    |
| Area QRS-T angle       | White CHD-free(221/10135) | Reference (1.00)        |                          | Reference (1.00)       |                          |
|                        | Black CHD-free(184/3591)  | 0.89(0.75-1.07)         | 0.225                    | 0.88(0.73-1.05)        | 0.159                    |
|                        | White CHD(88/534)         | <b>1.24(1.01-1.52)</b>  | <b>0.043</b>             | 1.09(0.88-4.35)        | 0.437                    |
|                        | Black CHD(29/148)         | 0.82(0.58-1.14)         | 0.237                    | 0.87(0.62-1.23)        | 0.434                    |
| Peak SVG magnitude     | White CHD-free(221/10135) | Reference (1.00)        |                          | Reference (1.00)       |                          |
|                        | Black CHD-free(184/3591)  | <b>1.22(1.001-1.48)</b> | <b>0.049</b>             | 1.18(0.97-1.43)        | 0.100                    |
|                        | White CHD(88/534)         | 0.95(0.71-1.26)         | 0.706                    | 0.88(0.63-1.21)        | 0.423                    |
|                        | Black CHD(29/148)         | 0.90(0.60-1.35)         | 0.603                    | 1.36(0.88-2.09)        | 0.167                    |
| SVG magnitude          | White CHD-free(221/10135) | Reference (1.00)        |                          | Reference (1.00)       |                          |
|                        | Black CHD-free(184/3591)  | 1.19(0.98-1.44)         | 0.080                    | 1.16(0.96-1.40)        | 0.128                    |
|                        | White CHD(88/534)         | 1.06(0.80-1.41)         | 0.701                    | 0.90(0.67-1.21)        | 0.501                    |
|                        | Black CHD(29/148)         | 0.83(0.57-1.22)         | 0.348                    | 1.10(0.72-1.67)        | 0.664                    |
| SAI QRST               | White CHD-free(221/10135) | Reference (1.00)        |                          | Reference (1.00)       |                          |
|                        | Black CHD-free(184/3591)  | 1.07(0.91-1.26)         | 0.404                    | 1.08(0.95-1.23)        | 0.219                    |
|                        | White CHD(88/534)         | <b>1.26(1.01-1.56)</b>  | <b>0.038</b>             | 1.13(0.94-1.36)        | 0.207                    |

|                    |                           |                        |              |                         |              |
|--------------------|---------------------------|------------------------|--------------|-------------------------|--------------|
|                    | Black CHD(29/148)         | <b>0.71(0.51-0.99)</b> | <b>0.045</b> | 0.95(0.76-1.19)         | 0.653        |
| Cornell voltage    | White CHD-free(221/10135) | Reference (1.00)       |              | Reference (1.00)        |              |
|                    | Black CHD-free(184/3591)  | 0.97(0.82-1.16)        | 0.763        | 1.09(0.96-1.24)         | 0.198        |
|                    | White CHD(88/534)         | 0.79(0.62-1.003)       | 0.053        | 0.94(0.77-1.13)         | 0.491        |
|                    | Black CHD(29/148)         | 0.78(0.57-1.08)        | 0.130        | 0.95(0.70-1.30)         | 0.757        |
| Peak QRS-T angle   | White BMI-1(75/3951)      | Reference (1.00)       |              | Reference (1.00)        |              |
|                    | White BMI-2(117/4292)     | 1.00(0.80-1.24)        | 0.979        | 0.93(0.74-1.17)         | 0.519        |
|                    | White BMI-3(117/2426)     | 0.97(0.78-1.21)        | 0.785        | 0.88(0.69-1.10)         | 0.275        |
|                    | Black BMI-1(46/832)       | 0.81(0.59-1.10)        | 0.169        | 0.83(0.61-1.14)         | 0.245        |
|                    | Black BMI-2(82/1397)      | 0.77(0.60-0.97)        | 0.028        | <b>0.70(0.54-0.90)</b>  | <b>0.006</b> |
|                    | Black BMI-3(85/1510)      | 0.99(0.79-1.24)        | 0.920        | 1.02(0.79-1.33)         | 0.858        |
| Area QRS-T angle   | White BMI-1(75/3951)      | Reference (1.00)       |              | Reference (1.00)        |              |
|                    | White BMI-2(117/4292)     | 0.81(0.63-1.04)        | 0.098        | 0.90(0.71-1.14)         | 0.391        |
|                    | White BMI-3(117/2426)     | 0.80(0.63-1.02)        | 0.077        | 0.88(0.69-1.12)         | 0.301        |
|                    | Black BMI-1(46/832)       | <b>0.57(0.41-0.81)</b> | <b>0.002</b> | <b>0.71(0.51-0.98)</b>  | <b>0.040</b> |
|                    | Black BMI-2(82/1397)      | <b>0.65(0.49-0.85)</b> | <b>0.002</b> | <b>0.67(0.51-0.87)</b>  | <b>0.003</b> |
|                    | Black BMI-3(85/1510)      | <b>0.73(0.56-0.95)</b> | <b>0.018</b> | 0.95(0.72-1.25)         | 0.703        |
| Peak SVG magnitude | White BMI-1(75/3951)      | Reference (1.00)       |              | Reference (1.00)        |              |
|                    | White BMI-2(117/4292)     | 1.10(0.80-1.50)        | 0.566        | 1.25(0.91-1.72)         | 0.177        |
|                    | White BMI-3(117/2426)     | 1.08(0.79-1.47)        | 0.646        | 1.11(0.79-1.55)         | 0.555        |
|                    | Black BMI-1(46/832)       | 1.18(0.85-1.64)        | 0.321        | 1.11(0.79-1.56)         | 0.545        |
|                    | Black BMI-2(82/1397)      | 1.14(0.83-1.58)        | 0.414        | <b>1.38(1.01-1.88)</b>  | <b>0.043</b> |
|                    | Black BMI-3(85/1510)      | 1.38(0.995-1.90)       | 0.054        | <b>1.51(1.10-2.07)</b>  | <b>0.010</b> |
| SVG magnitude      | White BMI-1(75/3951)      | Reference (1.00)       |              | Reference (1.00)        |              |
|                    | White BMI-2(117/4292)     | 1.03(0.74-1.42)        | 0.867        | 1.13(0.83-1.54)         | 0.431        |
|                    | White BMI-3(117/2426)     | 1.00(0.72-1.37)        | 0.981        | 0.97(0.70-1.36)         | 0.872        |
|                    | Black BMI-1(46/832)       | 1.07(0.78-1.47)        | 0.668        | 0.96(0.70-1.33)         | 0.822        |
|                    | Black BMI-2(82/1397)      | 1.02(0.74-1.40)        | 0.918        | 1.22(0.90-1.65)         | 0.191        |
|                    | Black BMI-3(85/1510)      | 1.32(0.95-1.84)        | 0.098        | 1.35(0.98-1.86)         | 0.062        |
| SAI QRST           | White BMI-1(75/3951)      | Reference (1.00)       |              | Reference (1.00)        |              |
|                    | White BMI-2(117/4292)     | 1.03(0.81-1.30)        | 0.825        | 0.97(0.80-1.18)         | 0.762        |
|                    | White BMI-3(117/2426)     | 1.02(0.80-1.31)        | 0.864        | 1.06(0.84-1.33)         | 0.643        |
|                    | Black BMI-1(46/832)       | 0.77(0.58-1.02)        | 0.069        | 0.88(0.68-1.15)         | 0.356        |
|                    | Black BMI-2(82/1397)      | <b>0.75(0.59-0.95)</b> | <b>0.019</b> | 0.87(0.70-1.08)         | 0.194        |
|                    | Black BMI-3(85/1510)      | 1.12(0.91-1.40)        | 0.288        | <b>1.22(0.998-1.49)</b> | <b>0.052</b> |
| Cornell voltage    | White BMI-1(75/3951)      | Reference (1.00)       |              | Reference (1.00)        |              |
|                    | White BMI-2(117/4292)     | 1.01(0.75-1.35)        | 0.968        | 0.95(0.78-1.17)         | 0.656        |
|                    | White BMI-3(117/2426)     | 1.05(0.78-1.41)        | 0.749        | 0.91(0.71-1.15)         | 0.421        |
|                    | Black BMI-1(46/832)       | 1.00(0.74-1.36)        | 0.995        | 1.01(0.811-1.27)        | 0.905        |
|                    | Black BMI-2(82/1397)      | 0.96(0.73-1.27)        | 0.791        | 0.86(0.68-1.08)         | 0.200        |
|                    | Black BMI-3(85/1510)      | 1.19(0.89-1.60)        | 0.246        | <b>1.26(1.05-1.52)</b>  | <b>0.015</b> |

#Proportionality hazards assumption not met; SVG=spatial ventricular gradient; RHR=relative hazard ratio; HTN=hypertension; CHD=coronary heart disease; BMI-1=under- or normal-weight; BMI-2=overweight; BMI-3=obese.

**Table S6. Two-way interactions in association of global ECG measures with SCD in competing risk models: race-hypertension; race-coronary heart disease, and race-BMI category.**

| Predictor,<br>per 1 SD | Subgroup                  | Competing SCD risk model 1 |                          | Competing SCD risk model 2 |                          |
|------------------------|---------------------------|----------------------------|--------------------------|----------------------------|--------------------------|
|                        |                           | RSHR(95%CI)                | P <sub>interaction</sub> | RSHR (95%CI)               | P <sub>interaction</sub> |
| Peak QRS-T angle       | White HTN-free(161/7623)  | Reference (1.00)           |                          | Reference (1.00)           |                          |
|                        | Black HTN-free(46/1616)   | 0.93(0.71-1.23)            | 0.611                    | 0.87(0.64-1.17)            | 0.348                    |
|                        | White HTN(148/2737)       | 0.93(0.78-1.09)            | 0.368                    | 0.87(0.72-1.04)            | 0.134                    |
|                        | Black HTN(167/1910)       | <b>0.79(0.67-0.93)</b>     | <b>0.005</b>             | <b>0.80(0.67-0.96)</b>     | <b>0.019</b>             |
| Area QRS-T angle       | White HTN-free(161/7623)  | Reference (1.00)           |                          | Reference (1.00)           |                          |
|                        | Black HTN-free(46/1616)   | 1.04(0.74-1.44)            | 0.834                    | 0.97(0.71-1.33)            | 0.850                    |
|                        | White HTN(148/2737)       | 0.93(0.77-1.12)            | 0.448                    | 0.90(0.74-1.10)            | 0.320                    |
|                        | Black HTN(167/1910)       | <b>0.71(0.59-0.86)</b>     | <b>&lt;0.0001</b>        | <b>0.72(0.59-0.89)</b>     | <b>0.002</b>             |
| Peak SVG magnitude     | White HTN-free(161/7623)  | Reference (1.00)           |                          | Reference (1.00)           |                          |
|                        | Black HTN-free(46/1616)   | <b>1.42(1.07-1.89)</b>     | <b>0.017</b>             | <b>1.50(1.07-2.09)</b>     | <b>0.018</b>             |
|                        | White HTN(148/2737)       | 1.26(0.99-1.60)            | 0.063                    | 1.15(0.87-1.51)            | 0.326                    |
|                        | Black HTN(167/1910)       | 1.19(0.96-1.48)            | 0.120                    | 1.22(0.97-1.53)            | 0.090                    |
| SVG magnitude          | White HTN-free(161/7623)  | Reference (1.00)           |                          | Reference (1.00)           |                          |
|                        | Black HTN-free(46/1616)   | <b>1.32(1.00-1.76)</b>     | <b>0.050</b>             | <b>1.44(1.05-1.96)</b>     | <b>0.023</b>             |
|                        | White HTN(148/2737)       | <b>1.27(1.01-1.61)</b>     | <b>0.043</b>             | 1.16(0.90-1.51)            | 0.255                    |
|                        | Black HTN(167/1910)       | 1.12(0.90-1.38)            | 0.314                    | 1.18(0.94-1.48)            | 0.155                    |
| SAI QRST               | White HTN-free(161/7623)  | Reference (1.00)           |                          | Reference (1.00)           |                          |
|                        | Black HTN-free(46/1616)   | 1.22(0.94-1.59)            | 0.132                    | 1.25(0.96-1.63)            | 0.102                    |
|                        | White HTN(148/2737)       | 1.11(0.93-1.33)            | 0.232                    | 1.01(0.87-1.16)            | 0.921                    |
|                        | Black HTN(167/1910)       | 0.90(0.75-1.08)            | 0.256                    | 0.96(0.82-1.12)            | 0.626                    |
| Cornell voltage        | White HTN-free(161/7623)  | Reference (1.00)           |                          | Reference (1.00)           |                          |
|                        | Black HTN-free(46/1616)   | 1.00(0.73-1.36)            | 0.985                    | 1.02(0.74-1.39)            | 0.922                    |
|                        | White HTN(148/2737)       | 1.09(0.87-1.36)            | 0.457                    | 1.01(0.86-1.20)            | 0.864                    |
|                        | Black HTN(167/1910)       | 1.01(0.82-1.25)            | 0.899                    | 1.11(0.94-1.32)            | 0.208                    |
| Peak QRS-T angle       | White CHD-free(221/10135) | Reference (1.00)           |                          | Reference (1.00)           |                          |
|                        | Black CHD-free(184/3591)  | 0.94(0.80-1.09)            | 0.408                    | 0.93(0.78-1.10)            | 0.402                    |
|                        | White CHD(88/534)         | 1.04(0.86-1.24)            | 0.708                    | 1.04(0.83-1.30)            | 0.762                    |
|                        | Black CHD(29/148)         | <b>0.71(0.52-0.96)</b>     | <b>0.027</b>             | 0.80(0.54-1.20)            | 0.282                    |
| Area QRS-T angle       | White CHD-free(221/10135) | Reference (1.00)           |                          | Reference (1.00)           |                          |
|                        | Black CHD-free(184/3591)  | 0.87(0.73-1.03)            | 0.108                    | 0.85(0.70-1.02)            | 0.087                    |
|                        | White CHD(88/534)         | 1.09(0.89-1.33)            | 0.396                    | 1.04(0.82-1.32)            | 0.745                    |
|                        | Black CHD(29/148)         | 0.77(0.56-1.09)            | 0.107                    | 0.84(0.60-1.18)            | 0.321                    |
| Peak SVG magnitude     | White CHD-free(221/10135) | Reference (1.00)           |                          | Reference (1.00)           |                          |
|                        | Black CHD-free(184/3591)  | 1.14(0.95-1.38)            | 0.160                    | 1.17(0.95-1.43)            | 0.132                    |
|                        | White CHD(88/534)         | 0.94(0.70-1.26)            | 0.681                    | 0.86(0.61-1.20)            | 0.366                    |
|                        | Black CHD(29/148)         | 0.76(0.51-1.14)            | 0.182                    | 1.02(0.64-1.62)            | 0.926                    |
| SVG magnitude          | White CHD-free(221/10135) | Reference (1.00)           |                          | Reference (1.00)           |                          |
|                        | Black CHD-free(184/3591)  | 1.12(0.93-1.35)            | 0.215                    | 1.14(0.94-1.39)            | 0.197                    |
|                        | White CHD(88/534)         | 1.03(0.78-1.37)            | 0.815                    | 0.89(0.65-1.21)            | 0.443                    |
|                        | Black CHD(29/148)         | 0.69(0.47-1.01)            | 0.059                    | 0.88(0.54-1.42)            | 0.595                    |
|                        | White CHD-free(221/10135) | Reference (1.00)           |                          | Reference (1.00)           |                          |



|                        |                           |                        |              |                        |              |
|------------------------|---------------------------|------------------------|--------------|------------------------|--------------|
| SAI<br>QRST            | Black CHD-free(184/3591)  | 1.02(0.87-1.18)        | 0.842        | 1.06(0.92-1.22)        | 0.395        |
|                        | White CHD(88/534)         | 1.07(0.87-1.31)        | 0.506        | 1.05(0.86-1.27)        | 0.631        |
|                        | Black CHD(29/148)         | <b>0.64(0.47-0.88)</b> | <b>0.007</b> | 0.86(0.64-1.17)        | 0.337        |
| Cornell<br>voltage     | White CHD-free(221/10135) | Reference (1.00)       |              | Reference (1.00)       |              |
|                        | Black CHD-free(184/3591)  | 0.96(0.81-1.13)        | 0.052        | 1.09(0.95-1.25)        | 0.219        |
|                        | White CHD(88/534)         | <b>0.76(0.60-0.98)</b> | <b>0.037</b> | 0.90(0.75-1.08)        | 0.256        |
|                        | Black CHD(29/148)         | 0.72(0.81-1.13)        | 0.615        | 0.91(0.54-1.53)        | 0.729        |
| Peak<br>QRS-T<br>angle | White BMI-1(75/3951)      | Reference (1.00)       |              | Reference (1.00)       |              |
|                        | White BMI-2(117/4292)     | 0.94(0.76-1.15)        | 0.546        | 0.87(0.69-1.09)        | 0.232        |
|                        | White BMI-3(117/2426)     | 0.91(0.74-1.12)        | 0.362        | 0.83(0.65-1.05)        | 0.112        |
|                        | Black BMI-1(46/832)       | <b>0.73(0.54-0.99)</b> | <b>0.043</b> | 0.78(0.57-1.07)        | 0.125        |
|                        | Black BMI-2(82/1397)      | <b>0.72(0.57-0.92)</b> | <b>0.008</b> | <b>0.68(0.52-0.88)</b> | <b>0.004</b> |
|                        | Black BMI-3(85/1510)      | 0.94(0.75-1.17)        | 0.562        | 0.96(0.73-1.26)        | 0.755        |
| Area<br>QRS-T<br>angle | White BMI-1(75/3951)      | Reference (1.00)       |              | Reference (1.00)       |              |
|                        | White BMI-2(117/4292)     | 0.82(0.65-1.04)        | 0.098        | 0.86(0.67-1.11)        | 0.255        |
|                        | White BMI-3(117/2426)     | <b>0.78(0.62-0.97)</b> | <b>0.029</b> | 0.82(0.63-1.06)        | 0.136        |
|                        | Black BMI-1(46/832)       | <b>0.57(0.41-0.78)</b> | <b>0.001</b> | <b>0.65(0.46-0.90)</b> | <b>0.009</b> |
|                        | Black BMI-2(82/1397)      | <b>0.64(0.49-0.83)</b> | <b>0.001</b> | <b>0.65(0.49-0.87)</b> | <b>0.004</b> |
|                        | Black BMI-3(85/1510)      | <b>0.75(0.58-0.96)</b> | <b>0.024</b> | 0.86(0.64-1.17)        | 0.336        |
| Peak SVG<br>magnitude  | White BMI-1(75/3951)      | Reference (1.00)       |              | Reference (1.00)       |              |
|                        | White BMI-2(117/4292)     | 1.16(0.86-1.57)        | 0.328        | 1.28(0.93-1.76)        | 0.132        |
|                        | White BMI-3(117/2426)     | 1.13(0.85-1.49)        | 0.411        | 1.15(0.81-1.64)        | 0.438        |
|                        | Black BMI-1(46/832)       | 1.14(0.87-1.51)        | 0.343        | 1.11(0.79-1.55)        | 0.555        |
|                        | Black BMI-2(82/1397)      | 1.14(0.84-1.54)        | 0.403        | <b>1.43(1.02-2.01)</b> | <b>0.036</b> |
|                        | Black BMI-3(85/1510)      | 1.25(0.94-1.67)        | 0.130        | <b>1.44(1.07-1.94)</b> | <b>0.017</b> |
| SVG<br>magnitude       | White BMI-1(75/3951)      | Reference (1.00)       |              | Reference (1.00)       |              |
|                        | White BMI-2(117/4292)     | 1.13(0.84-1.52)        | 0.423        | 1.15(0.84-1.58)        | 0.377        |
|                        | White BMI-3(117/2426)     | 1.10(0.82-1.47)        | 0.527        | 1.04(0.73-1.47)        | 0.847        |
|                        | Black BMI-1(46/832)       | 0.99(0.74-1.32)        | 0.922        | 0.96(0.69-1.34)        | 0.800        |
|                        | Black BMI-2(82/1397)      | 0.99(0.73-1.34)        | 0.956        | 1.27(0.90-1.79)        | 0.178        |
|                        | Black BMI-3(85/1510)      | 1.16(0.86-1.57)        | 0.328        | 1.27(0.92-1.75)        | 0.152        |
| SAI<br>QRST            | White BMI-1(75/3951)      | Reference (1.00)       |              | Reference (1.00)       |              |
|                        | White BMI-2(117/4292)     | 1.02(0.84-1.25)        | 0.813        | 0.99(0.83-1.19)        | 0.959        |
|                        | White BMI-3(117/2426)     | 0.99(0.80-1.23)        | 0.923        | 1.04(0.83-1.29)        | 0.754        |
|                        | Black BMI-1(46/832)       | 0.76(0.57-1.02)        | 0.070        | 0.86(0.62-1.20)        | 0.373        |
|                        | Black BMI-2(82/1397)      | <b>0.76(0.63-0.93)</b> | <b>0.006</b> | 0.86(0.70-1.06)        | 0.148        |
|                        | Black BMI-3(85/1510)      | 1.06(0.84-1.33)        | 0.637        | <b>1.24(1.01-1.51)</b> | <b>0.037</b> |
| Cornell<br>voltage     | White BMI-1(75/3951)      | Reference (1.00)       |              | Reference (1.00)       |              |
|                        | White BMI-2(117/4292)     | 1.03(0.79-1.33)        | 0.643        | 0.95(0.78-1.15)        | 0.591        |
|                        | White BMI-3(117/2426)     | 1.02(0.76-1.37)        | 0.897        | 0.87(0.68-1.12)        | 0.287        |
|                        | Black BMI-1(46/832)       | 0.97(0.73-1.28)        | 0.812        | 1.00(0.78-1.27)        | 0.992        |
|                        | Black BMI-2(82/1397)      | 0.96(0.74-1.24)        | 0.739        | 0.83(0.64-1.07)        | 0.150        |
|                        | Black BMI-3(85/1510)      | 1.14(0.85-1.52)        | 0.375        | <b>1.31(1.10-1.56)</b> | <b>0.003</b> |

#Proportionality hazards assumption not met; SVG=spatial ventricular gradient; RHR=relative hazard ratio; HTN=hypertension; CHD=coronary heart disease; BMI-1=under- or normal-weight; BMI-2=overweight; BMI-3=obese.

**Table S7. Stratified association of global ECG measures with SCD in Cox models: race-hypertension; race-coronary heart disease, and race-BMI category subgroups.**

| Predictor,<br>per 1 SD | Subgroup                  | Cox model 1             |                   | Cox model 2            |                   |
|------------------------|---------------------------|-------------------------|-------------------|------------------------|-------------------|
|                        |                           | HR(95%CI)               | P                 | HR (95%CI)             | P                 |
| Peak QRS-T angle       | White HTN-free(161/7623)  | <b>1.34(1.17-1.54)</b>  | <b>&lt;0.0001</b> | <b>1.30(1.13-1.49)</b> | <b>&lt;0.0001</b> |
|                        | Black HTN-free(46/1616)   | 1.30(0.97-1.73)         | 0.078             | 1.00(0.72-1.41)        | 0.974             |
|                        | White HTN(148/2737)       | <b>1.37(1.21-1.57)</b>  | <b>&lt;0.0001</b> | <b>1.17(1.01-1.35)</b> | <b>0.031</b>      |
|                        | Black HTN(167/1910)       | <b>1.27(1.12-1.43)</b>  | <b>&lt;0.0001</b> | 1.13(0.98-1.30)        | 0.087             |
| Area QRS-T angle       | White HTN-free(161/7623)  | <b>1.36(1.17-1.58)#</b> | <b>&lt;0.0001</b> | <b>1.32(1.14-1.54)</b> | <b>&lt;0.0001</b> |
|                        | Black HTN-free(46/1616)   | <b>1.52(1.09-2.11)</b>  | <b>0.013</b>      | 1.21(0.86-1.69)        | 0.276             |
|                        | White HTN(148/2737)       | <b>1.41(1.22-1.63)</b>  | <b>&lt;0.0001</b> | <b>1.25(1.07-1.45)</b> | <b>0.004</b>      |
|                        | Black HTN(167/1910)       | 1.15(0.99-1.32)         | 0.060             | 1.06(0.91-1.25)        | 0.430             |
| Peak SVG magnitude     | White HTN-free(161/7623)  | <b>0.83(0.69-0.99)</b>  | <b>0.041</b>      | 0.89(0.73-1.07)        | 0.203             |
|                        | Black HTN-free(46/1616)   | 1.04(0.76-1.41)         | 0.826             | 1.14(0.85-1.51)        | 0.387             |
|                        | White HTN(148/2737)       | 0.97(0.81-1.17)#        | 0.780             | 1.04(0.86-1.25)        | 0.703             |
|                        | Black HTN(167/1910)       | 1.01(0.87-1.17)         | 0.882             | 1.06(0.91-1.22)        | 0.462             |
| SVG magnitude          | White HTN-free(161/7623)  | 0.90(0.75-1.08)         | 0.247             | 0.91(0.76-1.10)        | 0.342             |
|                        | Black HTN-free(46/1616)   | 1.03(0.76-1.39)         | 0.863             | 1.14(0.86-1.52)        | 0.372             |
|                        | White HTN(148/2737)       | 1.08(0.90-1.30)#        | 0.402             | 1.08(0.90-1.29)        | 0.420             |
|                        | Black HTN(167/1910)       | 1.06(0.92-1.23)         | 0.422             | 1.08(0.94-1.26)        | 0.282             |
| SAI QRST               | White HTN-free(161/7623)  | 1.09(0.92-1.29)         | 0.312             | 1.10(0.95-1.27)        | 0.195             |
|                        | Black HTN-free(46/1616)   | 1.27(0.93-1.75)         | 0.136             | 1.27(0.92-1.75)        | 0.153             |
|                        | White HTN(148/2737)       | <b>1.36(1.18-1.56)</b>  | <b>&lt;0.0001</b> | <b>1.15(1.03-1.28)</b> | <b>0.010</b>      |
|                        | Black HTN(167/1910)       | <b>1.14(1.02-1.27)</b>  | <b>0.020</b>      | <b>1.12(1.02-1.23)</b> | <b>0.024</b>      |
| Cornell voltage        | White HTN-free(161/7623)  | 1.04(0.86-1.25)         | 0.707             | 1.07(0.93-1.24)        | 0.347             |
|                        | Black HTN-free(46/1616)   | 1.02(0.72-1.44)         | 0.925             | 0.98(0.67-1.46)        | 0.944             |
|                        | White HTN(148/2737)       | <b>1.23(1.05-1.44)</b>  | <b>0.012</b>      | 1.12(0.99-1.27)        | 0.065             |
|                        | Black HTN(167/1910)       | <b>1.22(1.08-1.39)</b>  | <b>0.002</b>      | <b>1.19(1.08-1.31)</b> | <b>&lt;0.0001</b> |
| Peak QRS-T angle       | White CHD-free(221/10135) | <b>1.28(1.14-1.44)</b>  | <b>&lt;0.0001</b> | <b>1.20(1.06-1.35)</b> | <b>0.004</b>      |
|                        | Black CHD-free(184/3591)  | <b>1.27(1.13-1.43)</b>  | <b>&lt;0.0001</b> | 1.10(0.96-1.26)        | 0.161             |
|                        | White CHD(88/534)         | <b>1.53(1.28-1.83)</b>  | <b>&lt;0.0001</b> | <b>1.35(1.10-1.65)</b> | <b>0.004</b>      |
|                        | Black CHD(29/148)         | 1.24(0.81-1.88)         | 0.323             | 1.00(0.64-1.54)        | 0.991             |
| Area QRS-T angle       | White CHD-free(221/10135) | <b>1.24(1.09-1.41)</b>  | <b>0.001</b>      | <b>1.24(1.09-1.40)</b> | <b>0.001</b>      |
|                        | Black CHD-free(184/3591)  | <b>1.18(1.03-1.36)</b>  | <b>0.018</b>      | 1.05(0.90-1.22)        | 0.545             |
|                        | White CHD(88/534)         | <b>1.67(1.38-2.01)</b>  | <b>&lt;0.0001</b> | <b>1.42(1.16-1.75)</b> | <b>0.001</b>      |
|                        | Black CHD(29/148)         | 1.17(0.72-1.89)         | 0.535             | 1.53(0.97-2.44)        | 0.070             |
| Peak SVG magnitude     | White CHD-free(221/10135) | 0.91(0.78-1.06)         | 0.222             | 0.99(0.85-1.15)        | 0.898             |
|                        | Black CHD-free(184/3591)  | 1.07(0.93-1.23)         | 0.359             | 1.07(0.93-1.22)        | 0.353             |
|                        | White CHD(88/534)         | 0.87(0.67-1.12)         | 0.279             | 0.90(0.66-1.23)        | 0.502             |
|                        | Black CHD(29/148)         | 1.28(0.77-2.11)         | 0.345             | 1.40(0.83-1.36)        | 0.208             |
| SVG magnitude          | White CHD-free(221/10135) | 0.98(0.84-1.15)         | 0.828             | 1.04(0.89-1.21)        | 0.623             |
|                        | Black CHD-free(184/3591)  | 1.12(0.98-1.29)         | 0.107             | 1.10(0.96-1.25)        | 0.172             |
|                        | White CHD(88/534)         | 1.01(0.79-1.29)         | 0.930             | 0.90(0.68-1.19)        | 0.467             |
|                        | Black CHD(29/148)         | 0.99(0.59-1.65)         | 0.961             | 1.14(0.66-1.97)        | 0.650             |
| SAI QRST               | White CHD-free(221/10135) | 1.13(0.98-1.30)         | 0.088             | 1.10(0.99-1.22)        | 0.064             |
|                        | Black CHD-free(184/3591)  | <b>1.23(1.11-1.37)</b>  | <b>&lt;0.0001</b> | <b>1.13(1.03-1.25)</b> | <b>0.012</b>      |
|                        | White CHD(88/534)         | <b>1.43(1.17-1.74)</b>  | <b>&lt;0.0001</b> | <b>1.30(1.07-1.59)</b> | <b>0.008</b>      |

|                    |                           |                         |                   |                         |                   |
|--------------------|---------------------------|-------------------------|-------------------|-------------------------|-------------------|
|                    | Black CHD(29/148)         | 0.78(0.49-1.24)         | 0.298             | 1.14(0.85-1.52)         | 0.370             |
| Cornell voltage    | White CHD-free(221/10135) | <b>1.20(1.04-1.39)</b>  | <b>0.015</b>      | <b>1.13(1.01-1.26)</b>  | <b>0.032</b>      |
|                    | Black CHD-free(184/3591)  | <b>1.23(1.08-1.39)</b>  | <b>0.001</b>      | <b>1.17(1.07-1.29)</b>  | <b>0.001</b>      |
|                    | White CHD(88/534)         | 0.97(0.78-1.20)         | 0.756             | 1.05(0.87-1.27)         | 0.621             |
|                    | Black CHD(29/148)         | 1.07(0.68-1.70)         | 0.767             | 1.34(0.96-1.87)         | 0.089             |
| Peak QRS-T angle   | White BMI-1(75/3951)      | <b>1.24(1.01-1.51)</b>  | <b>0.042</b>      | <b>1.28(1.02-1.60)</b>  | <b>0.029</b>      |
|                    | White BMI-2(117/4292)     | <b>1.40(1.20-1.64)</b>  | <b>&lt;0.0001</b> | <b>1.25(1.06-1.47)</b>  | <b>0.007</b>      |
|                    | White BMI-3(117/2426)     | <b>1.44(1.24-1.67)</b>  | <b>&lt;0.0001</b> | <b>1.19(1.01-1.40)</b>  | <b>0.038</b>      |
|                    | Black BMI-1(46/832)       | 1.18(0.89-1.57)         | 0.242             | 1.05(0.78-1.42)         | 0.750             |
|                    | Black BMI-2(82/1397)      | 1.12(0.93-1.34)         | 0.243             | 1.03(0.83-1.27)         | 0.812             |
|                    | Black BMI-3(85/1510)      | <b>1.43(1.20-1.69)</b>  | <b>&lt;0.0001</b> | <b>1.35(1.09-1.68)</b>  | <b>0.006</b>      |
| Area QRS-T angle   | White BMI-1(75/3951)      | <b>1.52(1.23-1.89)</b>  | <b>&lt;0.0001</b> | <b>1.41(1.12-1.77)#</b> | <b>0.004</b>      |
|                    | White BMI-2(117/4292)     | <b>1.31(1.10-1.56)</b>  | <b>0.002</b>      | <b>1.25(1.05-1.48)</b>  | <b>0.012</b>      |
|                    | White BMI-3(117/2426)     | <b>1.39(1.17-1.65)</b>  | <b>&lt;0.0001</b> | <b>1.27(1.07-1.51)</b>  | <b>0.006</b>      |
|                    | Black BMI-1(46/832)       | 0.99(0.73-1.36)         | 0.970             | 0.90(0.65-1.23)         | 0.500             |
|                    | Black BMI-2(82/1397)      | 1.12(0.91-1.39)         | 0.288             | 1.08(0.86-1.36)         | 0.506             |
|                    | Black BMI-3(85/1510)      | <b>1.31(1.07-1.59)</b>  | <b>0.008</b>      | <b>1.38(1.09-1.74)</b>  | <b>0.007</b>      |
| Peak SVG magnitude | White BMI-1(75/3951)      | 0.88(0.68-1.14)         | 0.343             | 0.88(0.67-1.14)         | 0.327             |
|                    | White BMI-2(117/4292)     | 0.95(0.77-1.17)         | 0.622             | 1.04(0.84-1.30)         | 0.712             |
|                    | White BMI-3(117/2426)     | 0.88(0.71-1.08)         | 0.222             | 0.95(0.74-1.21)         | 0.658             |
|                    | Black BMI-1(46/832)       | 0.87(0.67-1.12)         | 0.278             | 0.89(0.67-1.19)         | 0.436             |
|                    | Black BMI-2(82/1397)      | 0.95(0.76-1.21)         | 0.697             | 1.18(0.96-1.47)         | 0.121             |
|                    | Black BMI-3(85/1510)      | 1.18(0.94-1.48)         | 0.154             | <b>1.28(1.01-1.62)</b>  | <b>0.040</b>      |
| SVG magnitude      | White BMI-1(75/3951)      | 0.98(0.76-1.26)         | 0.860             | 0.99(0.77-1.27)         | 0.911             |
|                    | White BMI-2(117/4292)     | 1.05(0.85-1.30)         | 0.656             | 1.06(0.86-1.31)         | 0.566             |
|                    | White BMI-3(117/2426)     | 0.94(0.75-1.18)         | 0.606             | 0.94(0.73-1.19)         | 0.591             |
|                    | Black BMI-1(46/832)       | 0.86(0.68-1.10)         | 0.231             | 0.87(0.66-1.14)         | 0.317             |
|                    | Black BMI-2(82/1397)      | 0.96(0.76-1.22)         | 0.748             | 1.23(0.996-1.52)        | 0.055             |
|                    | Black BMI-3(85/1510)      | <b>1.36(1.07-1.72)</b>  | <b>0.012</b>      | <b>1.28(1.01-1.63)</b>  | <b>0.041</b>      |
| SAI QRST           | White BMI-1(75/3951)      | 1.17(0.96-1.43)         | 0.109             | 1.15(0.95-1.38)         | 0.147             |
|                    | White BMI-2(117/4292)     | <b>1.24(1.05-1.47)#</b> | <b>0.013</b>      | 1.08(0.96-1.22)         | 0.201             |
|                    | White BMI-3(117/2426)     | <b>1.24(1.02-1.50)</b>  | <b>0.027</b>      | <b>1.23(1.03-1.47)</b>  | <b>0.026</b>      |
|                    | Black BMI-1(46/832)       | 0.89(0.68-1.18)         | 0.426             | 0.98(0.75-1.28)         | 0.875             |
|                    | Black BMI-2(82/1397)      | 0.94(0.78-1.14)         | 0.537             | 1.04(0.89-1.21)         | 0.620             |
|                    | Black BMI-3(85/1510)      | <b>1.50(1.30-1.73)</b>  | <b>&lt;0.0001</b> | <b>1.45(1.26-1.68)</b>  | <b>&lt;0.0001</b> |
| Cornell voltage    | White BMI-1(75/3951)      | 1.03(0.81-1.31)         | 0.807             | 1.12(0.94-1.34)         | 0.210             |
|                    | White BMI-2(117/4292)     | 1.14(0.94-1.39)         | 0.195             | 1.04(0.90-1.20)         | 0.582             |
|                    | White BMI-3(117/2426)     | 1.15(0.94-1.42)         | 0.184             | 1.10(0.91-1.32)         | 0.322             |
|                    | Black BMI-1(46/832)       | 1.12(0.89-1.40)         | 0.334             | 1.13(0.92-1.38)         | 0.254             |
|                    | Black BMI-2(82/1397)      | 1.09(0.90-1.31)         | 0.384             | 0.99(0.83-1.18)         | 0.889             |
|                    | Black BMI-3(85/1510)      | <b>1.37(1.10-1.70)</b>  | <b>0.005</b>      | <b>1.47(1.28-1.68)</b>  | <b>&lt;0.0001</b> |

#Proportionality hazards assumption not met; SVG=spatial ventricular gradient; RHR=relative hazard ratio; HTN=hypertension; CHD=coronary heart disease; BMI-1=under- or normal-weight; BMI-2=overweight; BMI-3=obese.

**Table S8. Competing risk of sudden cardiac death in race-hypertension, race-coronary heart disease, and race-BMI category subgroups.**

| Predictor,<br>per 1 SD | Subgroup                  | Competing risk model 1 |                   | Competing risk model 2  |              |
|------------------------|---------------------------|------------------------|-------------------|-------------------------|--------------|
|                        |                           | SHR (95% CI)           | P                 | SHR (95% CI)            | P            |
| Peak QRS-T<br>angle    | White HTN-free(161/7784)  | <b>1.30(1.13-1.50)</b> | <b>&lt;0.0001</b> | <b>1.26(1.10-1.44)</b>  | <b>0.001</b> |
|                        | Black HTN-free(46/1662)   | 1.23(0.86-1.75)        | 0.258             | 1.14(0.77-1.68)         | 0.512        |
|                        | White HTN(148/2885)       | <b>1.25(1.08-1.44)</b> | <b>0.002</b>      | <b>1.17(1.00-1.36)</b>  | <b>0.045</b> |
|                        | Black HTN(167/2077)       | 1.10(0.96-1.27)        | 0.177             | 1.11(0.95-1.30)         | 0.200        |
| Area QRS-T<br>angle    | White HTN-free(161/7784)  | <b>1.31(1.09-1.56)</b> | <b>0.003</b>      | <b>1.31(1.10-1.54)</b>  | <b>0.002</b> |
|                        | Black HTN-free(46/1662)   | <b>1.51(1.01-2.25)</b> | <b>0.044</b>      | 1.37(0.95-1.97)         | 0.092        |
|                        | White HTN(148/2885)       | <b>1.25(1.07-1.47)</b> | <b>0.005</b>      | <b>1.25(1.08-1.47)</b>  | <b>0.004</b> |
|                        | Black HTN(167/2077)       | 0.96(0.82-1.12)        | 0.595             | 1.03(0.87-1.23)         | 0.739        |
| Peak SVG<br>magnitude  | White HTN-free(161/7784)  | 0.85(0.72-1.02)        | 0.078             | 0.89(0.74-1.08)         | 0.229        |
|                        | Black HTN-free(46/1662)   | 1.09(0.79-1.50)        | 0.603             | 1.16(0.85-1.58)         | 0.347        |
|                        | White HTN(148/2885)       | 0.97(0.81-1.18)        | 0.793             | 0.99(0.81-1.23)         | 0.991        |
|                        | Black HTN(167/2077)       | 0.94(0.80-1.10)        | 0.410             | 1.01(0.87-1.18)         | 0.889        |
| SVG<br>magnitude       | White HTN-free(161/7784)  | 0.92(0.77-1.09)        | 0.339             | 0.90(0.75-1.09)         | 0.282        |
|                        | Black HTN-free(46/1662)   | 1.04(0.73-1.46)        | 0.837             | 1.15(0.82-1.61)         | 0.413        |
|                        | White HTN(148/2885)       | 1.07(0.89-1.28)        | 0.476             | 1.05(0.87-1.27)         | 0.628        |
|                        | Black HTN(167/2077)       | 0.97(0.82-1.15)        | 0.739             | 1.03(0.87-1.21)         | 0.753        |
| SAI QRST               | White HTN-free(161/7784)  | 1.10(0.91-1.33)        | 0.312             | 1.08(0.95-1.23)         | 0.232        |
|                        | Black HTN-free(46/1662)   | 1.25(0.84-1.87)        | 0.270             | 1.33(0.92-1.92)         | 0.127        |
|                        | White HTN(148/2885)       | 1.19(1.02-1.39)        | 0.030             | <b>1.16(1.04-1.30)</b>  | <b>0.008</b> |
|                        | Black HTN(167/2077)       | 0.99(0.85-1.16)        | 0.909             | 1.11(0.98-1.27)         | 0.110        |
| Cornell<br>voltage     | White HTN-free(161/7784)  | 1.00(0.80-1.24)        | 0.976             | 1.06(0.92-1.23)         | 0.400        |
|                        | Black HTN-free(46/1662)   | 1.00(0.71-1.40)        | 0.985             | 1.13(0.78-1.63)         | 0.520        |
|                        | White HTN(148/2885)       | 1.11(0.96-1.29)        | 0.166             | 1.12(0.99-1.27)         | 0.065        |
|                        | Black HTN(167/2077)       | 1.12(0.98-1.27)        | 0.095             | <b>1.18(1.05-1.33)</b>  | <b>0.005</b> |
| Peak QRS-T<br>angle    | White CHD-free(221/10135) | <b>1.21(1.07-1.38)</b> | <b>0.002</b>      | <b>1.18(1.04-1.33)</b>  | <b>0.009</b> |
|                        | Black CHD-free(184/3591)  | 1.11(0.97-1.28)        | 0.132             | 1.07(0.93-1.24)         | 0.344        |
|                        | White CHD(88/534)         | <b>1.28(1.09-1.52)</b> | <b>0.004</b>      | <b>1.23(1.001-1.51)</b> | <b>0.048</b> |
|                        | Black CHD(29/148)         | 1.21(0.68-2.15)        | 0.516             | <b>54.12(3.5-832.2)</b> | <b>0.004</b> |
| Area QRS-T<br>angle    | White CHD-free(221/10135) | 1.16(0.996-1.34)       | 0.056             | <b>1.23(1.07-1.41)</b>  | <b>0.003</b> |
|                        | Black CHD-free(184/3591)  | 0.96(0.82-1.14)        | 0.672             | 1.02(0.87-1.20)         | 0.787        |
|                        | White CHD(88/534)         | <b>1.36(1.10-1.67)</b> | <b>0.004</b>      | <b>1.36(1.09-1.69)</b>  | <b>0.005</b> |
|                        | Black CHD(29/148)         | 1.05(0.55-2.01)        | 0.877             | 1.33(0.82-2.16)         | 0.244        |
| Peak SVG<br>magnitude  | White CHD-free(221/10135) | 0.93(0.80-1.08)        | 0.346             | 0.98(0.84-1.15)         | 0.824        |
|                        | Black CHD-free(184/3591)  | 1.02(0.89-1.18)        | 0.770             | 1.06(0.92-1.21)         | 0.412        |
|                        | White CHD(88/534)         | 0.89(0.69-1.16)        | 0.407             | 0.83(0.62-1.13)         | 0.240        |
|                        | Black CHD(29/148)         | 0.97(0.50-1.88)        | 0.919             | 1.04(0.62-1.73)         | 0.895        |
| SVG<br>magnitude       | White CHD-free(221/10135) | 1.00(0.87-1.16)        | 0.963             | 1.00(0.87-1.16)         | 0.963        |
|                        | Black CHD-free(184/3591)  | 1.08(0.93-1.25)        | 0.337             | 1.08(0.93-1.25)         | 0.337        |
|                        | White CHD(88/534)         | 1.06(0.83-1.34)        | 0.659             | 1.06(0.83-1.34)         | 0.659        |
|                        | Black CHD(29/148)         | 0.78(0.39-1.55)        | 0.473             | 0.78(0.39-1.55)         | 0.473        |
| SAI QRST               | White CHD-free(221/10135) | 1.13(0.97-1.31)        | 0.116             | 1.10(0.999-1.21)        | 0.051        |
|                        | Black CHD-free(184/3591)  | 1.14(0.99-1.32)        | 0.062             | <b>1.14(1.01-1.29)</b>  | <b>0.034</b> |
|                        | White CHD(88/534)         | 1.23(0.99-1.54)        | 0.067             | 1.22(0.99-1.51)         | 0.064        |

|                    |                           |                        |                   |                        |                   |
|--------------------|---------------------------|------------------------|-------------------|------------------------|-------------------|
|                    | Black CHD(29/148)         | 0.59(0.32-1.10)        | 0.095             | 2.61(0.20-33.58)       | 0.461             |
| Cornell voltage    | White CHD-free(221/10135) | <b>1.21(1.04-1.42)</b> | <b>0.014</b>      | <b>1.12(1.00-1.24)</b> | <b>0.043</b>      |
|                    | Black CHD-free(184/3591)  | <b>1.14(1.01-1.29)</b> | <b>0.034</b>      | <b>1.16(1.04-1.29)</b> | <b>0.007</b>      |
|                    | White CHD(88/534)         | 0.81(0.63-1.04)        | 0.094             | 0.97(0.82-1.16)        | 0.755             |
|                    | Black CHD(29/148)         | 1.06(0.53-2.13)        | 0.873             | 1.30(0.79-2.14)        | 0.298             |
| Peak QRS-T angle   | White BMI-1(75/3951)      | <b>1.27(1.01-1.60)</b> | <b>0.039</b>      | <b>1.35(1.08-1.67)</b> | <b>0.007</b>      |
|                    | White BMI-2(117/4292)     | <b>1.30(0.11-1.51)</b> | <b>0.001</b>      | <b>1.21(1.02-1.43)</b> | <b>0.026</b>      |
|                    | White BMI-3(117/2426)     | <b>1.25(1.05-1.49)</b> | <b>0.011</b>      | 1.13(0.95-1.33)        | 0.161             |
|                    | Black BMI-1(46/832)       | 0.89(0.60-1.33)        | 0.581             | 1.04(0.76-1.43)        | 0.792             |
|                    | Black BMI-2(82/1397)      | 1.02(0.83-1.27)        | 0.833             | 1.03(0.81-1.31)        | 0.829             |
|                    | Black BMI-3(85/1510)      | <b>1.24(1.02-1.51)</b> | <b>0.031</b>      | 1.27(0.99-1.63)        | 0.064             |
| Area QRS-T angle   | White BMI-1(75/3951)      | <b>1.65(1.26-2.15)</b> | <b>&lt;0.0001</b> | <b>1.48(1.16-1.90)</b> | <b>0.002</b>      |
|                    | White BMI-2(117/4292)     | <b>1.22(1.01-1.48)</b> | <b>0.043</b>      | <b>1.24(1.03-1.50)</b> | <b>0.024</b>      |
|                    | White BMI-3(117/2426)     | 1.18(0.96-1.44)        | 0.112             | <b>1.23(1.01-1.48)</b> | <b>0.036</b>      |
|                    | Black BMI-1(46/832)       | 0.74(0.51-1.09)        | 0.128             | 0.87(0.64-1.19)        | 0.383             |
|                    | Black BMI-2(82/1397)      | 1.01(0.80-1.28)        | 0.917             | 1.10(0.85-1.43)        | 0.476             |
|                    | Black BMI-3(85/1510)      | 1.10(0.88-1.37)        | 0.403             | 1.25(0.97-1.61)        | 0.090             |
| Peak SVG magnitude | White BMI-1(75/3951)      | 0.87(0.69-1.09)        | 0.216             | 0.84(0.64-1.12)        | 0.234             |
|                    | White BMI-2(117/4292)     | 0.96(0.76-1.20)        | 0.697             | 1.04(0.83-1.29)        | 0.740             |
|                    | White BMI-3(117/2426)     | 0.92(0.75-1.14)        | 0.464             | 0.93(0.72-1.21)        | 0.601             |
|                    | Black BMI-1(46/832)       | 0.90(0.70-1.15)        | 0.411             | 0.87(0.61-1.22)        | 0.414             |
|                    | Black BMI-2(82/1397)      | 0.94(0.72-1.22)        | 0.637             | 1.18(0.90-1.55)        | 0.226             |
|                    | Black BMI-3(85/1510)      | 0.97(0.76-1.24)        | 0.812             | 1.13(0.90-1.41)        | 0.295             |
| SVG magnitude      | White BMI-1(75/3951)      | 0.96(0.76-1.21)        | 0.708             | 0.94(0.72-1.24)        | 0.668             |
|                    | White BMI-2(117/4292)     | 1.05(0.85-1.30)        | 0.654             | 1.04(0.85-1.28)        | 0.684             |
|                    | White BMI-3(117/2426)     | 0.99(0.80-1.23)        | 0.946             | 0.92(0.72-1.18)        | 0.512             |
|                    | Black BMI-1(46/832)       | 0.87(0.68-1.11)        | 0.263             | 0.84(0.61-1.15)        | 0.270             |
|                    | Black BMI-2(82/1397)      | 0.95(0.72-1.24)        | 0.689             | 1.21(0.92-1.59)        | 0.183             |
|                    | Black BMI-3(85/1510)      | 1.07(0.83-1.38)        | 0.623             | 1.14(0.88-1.48)        | 0.323             |
| SAI QRST           | White BMI-1(75/3951)      | 1.16(0.88-1.52)        | 0.286             | 1.14(0.96-1.37)        | 0.139             |
|                    | White BMI-2(117/4292)     | 1.17(0.97-1.40)        | 0.101             | 1.09(0.97-1.22)        | 0.139             |
|                    | White BMI-3(117/2426)     | 1.09(0.89-1.34)        | 0.410             | <b>1.19(1.01-1.43)</b> | <b>0.041</b>      |
|                    | Black BMI-1(46/832)       | 0.81(0.54-1.21)        | 0.305             | 0.97(0.65-1.46)        | 0.891             |
|                    | Black BMI-2(82/1397)      | 0.89(0.72-1.09)        | 0.255             | 1.03(0.88-1.21)        | 0.693             |
|                    | Black BMI-3(85/1510)      | <b>1.23(1.01-1.50)</b> | <b>0.038</b>      | <b>1.47(1.22-1.77)</b> | <b>&lt;0.0001</b> |
| Cornell voltage    | White BMI-1(75/3951)      | 0.99(0.78-1.26)        | 0.937             | 1.16(0.98-1.37)        | 0.083             |
|                    | White BMI-2(117/4292)     | 1.07(0.88-1.30)        | 0.505             | 1.05(0.92-1.21)        | 0.474             |
|                    | White BMI-3(117/2426)     | 1.03(0.81-1.30)        | 0.809             | 1.02(0.85-1.23)        | 0.815             |
|                    | Black BMI-1(46/832)       | 1.07(0.80-1.43)        | 0.642             | 1.12(0.89-1.40)        | 0.353             |
|                    | Black BMI-2(82/1397)      | 1.07(0.89-1.29)        | 0.477             | 0.97(0.80-1.18)        | 0.769             |
|                    | Black BMI-3(85/1510)      | 1.15(0.90-1.47)        | 0.268             | <b>1.51(1.31-1.75)</b> | <b>&lt;0.0001</b> |

#Proportionality hazards assumption not met; SVG=spatial ventricular gradient; RHR=relative hazard ratio; HTN=hypertension; CHD=coronary heart disease; BMI-1=under- or normal-weight; BMI-2=overweight; BMI-3=obese.

**Figure S1. Estimated adjusted marginal (least-squares) means and 95% CI of (A) peak QRS-T angle, (B) area QRS-T angle, (C) peak SVG azimuth, and (D) area SVG azimuth for white and black participants.**

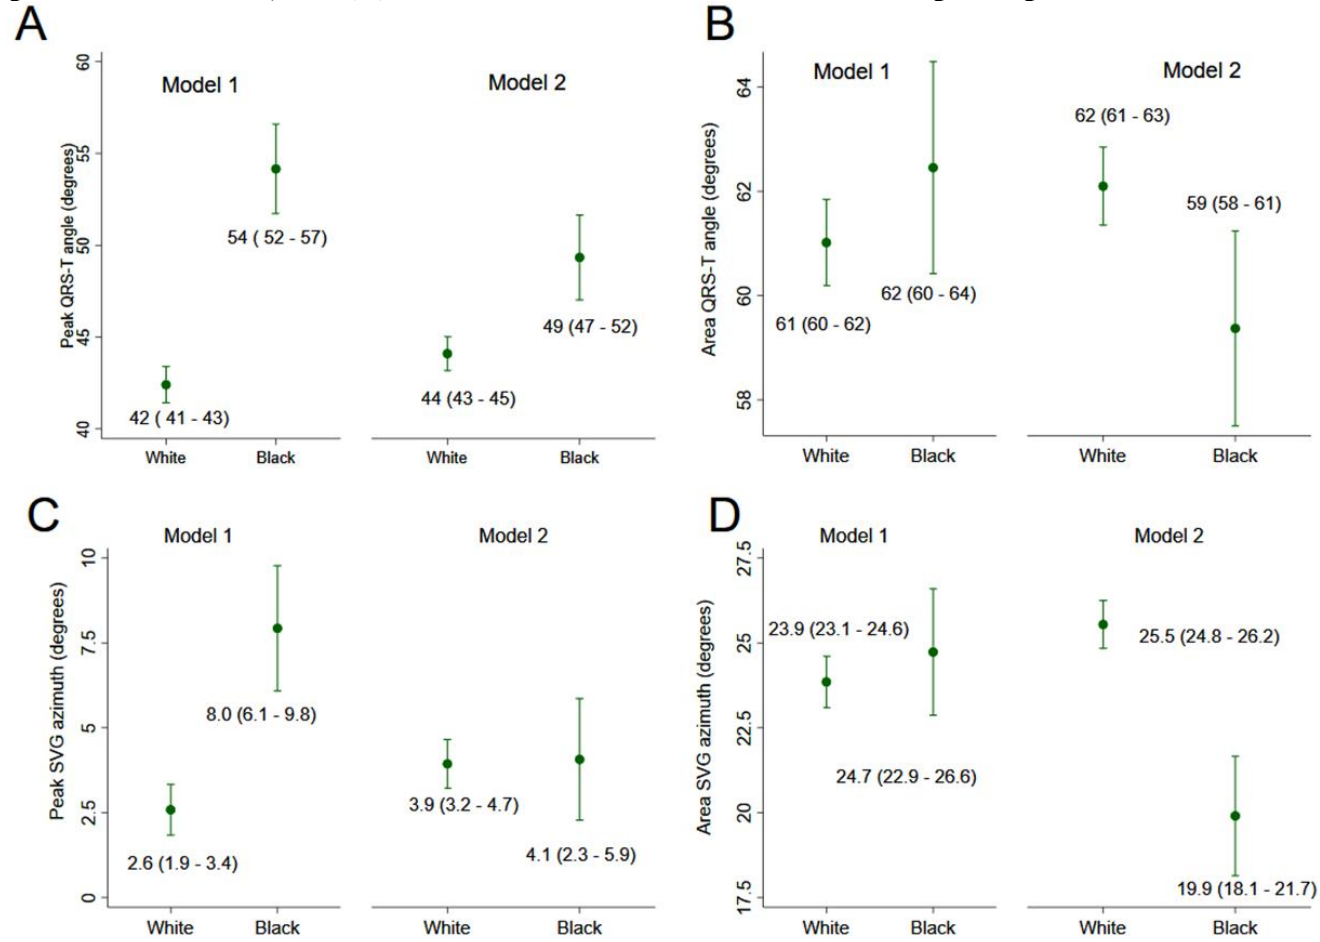

**Figure S2. Estimated adjusted marginal (least-squares) means and 95% CI of (A) peak SVG elevation, (B) heart rate, (C) QRS duration, and (D) QTc for white and black participants.**

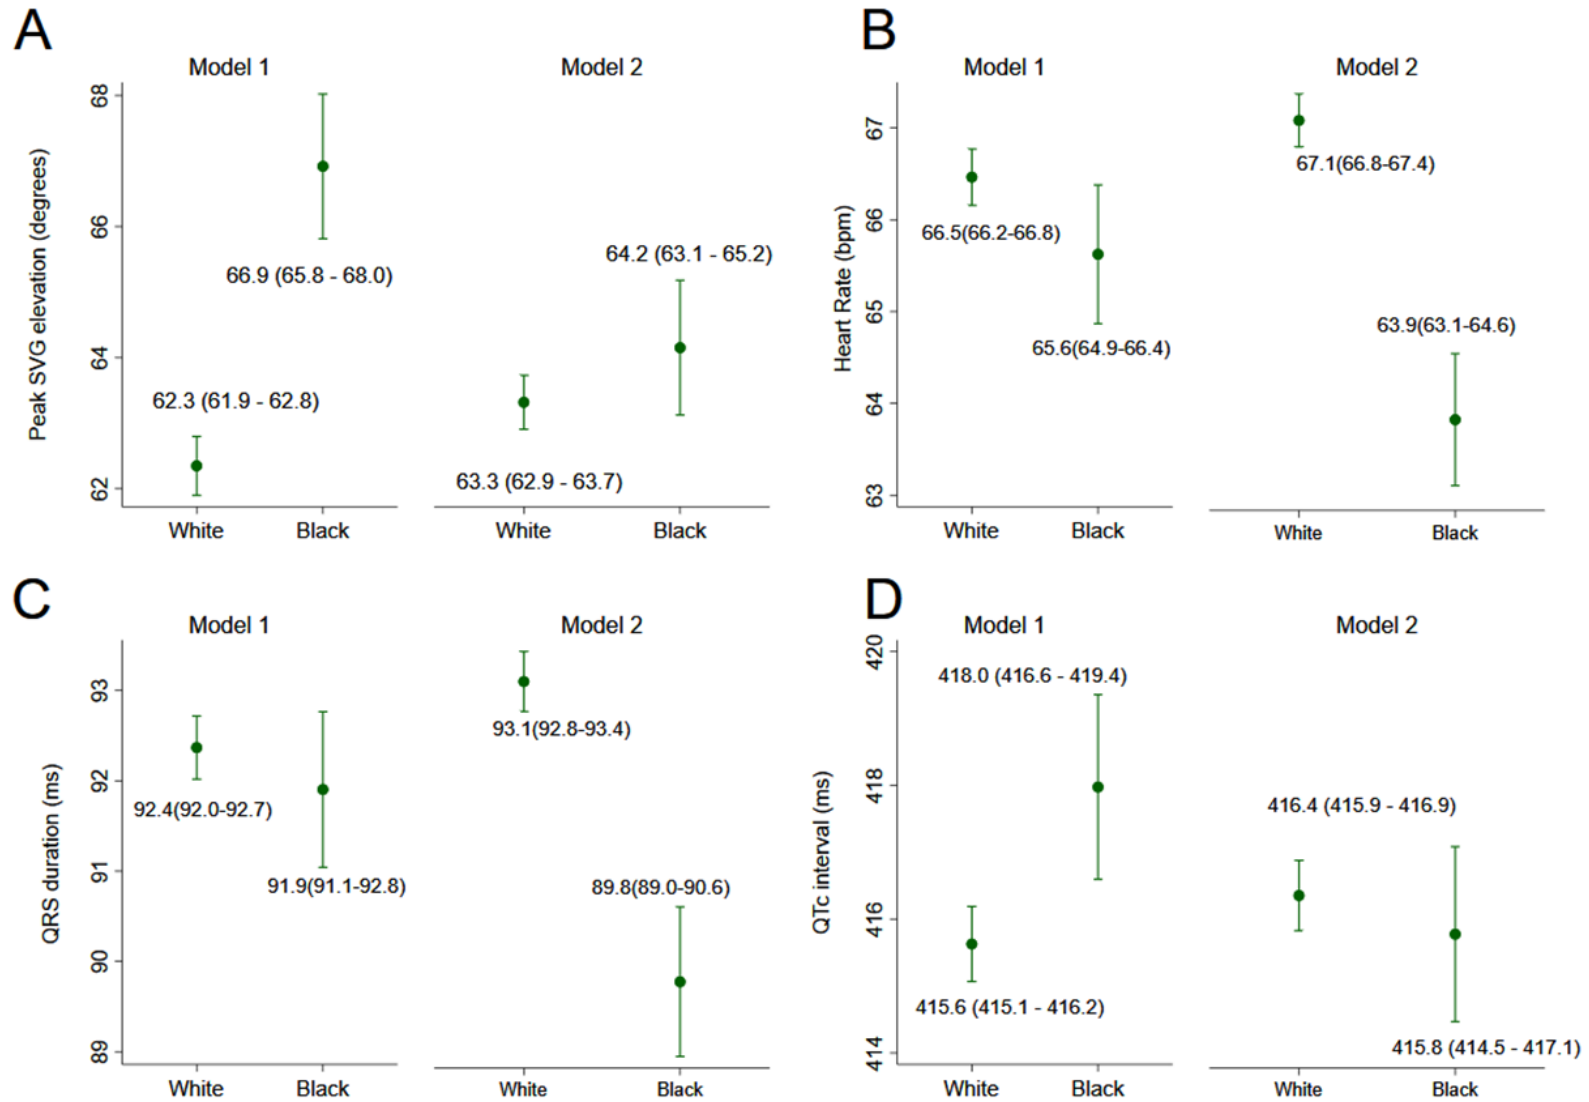

**Figure S3. Adjusted (model 1) risk of SCD associated with an area and peak SVG magnitude in black and white participants. Restricted cubic spline with 95% CI shows change in hazard ratio (Y-axis) in response to SVG magnitude change (X-axis). 50th percentile of SVG magnitude is selected as reference. Knots of area SVG magnitude in black participants are at 1.2 – 1.7 – 2.1 – 2.9 mV, and in white participants are at 1.0 – 1.4 – 1.8 – 2.4 mV. Knots of peak SVG magnitude in black participants are at 1.1 – 1.6 – 2.0 – 2.6 mV, and in white participants are at 0.9 – 1.4 – 1.7 – 2.2 mV.**

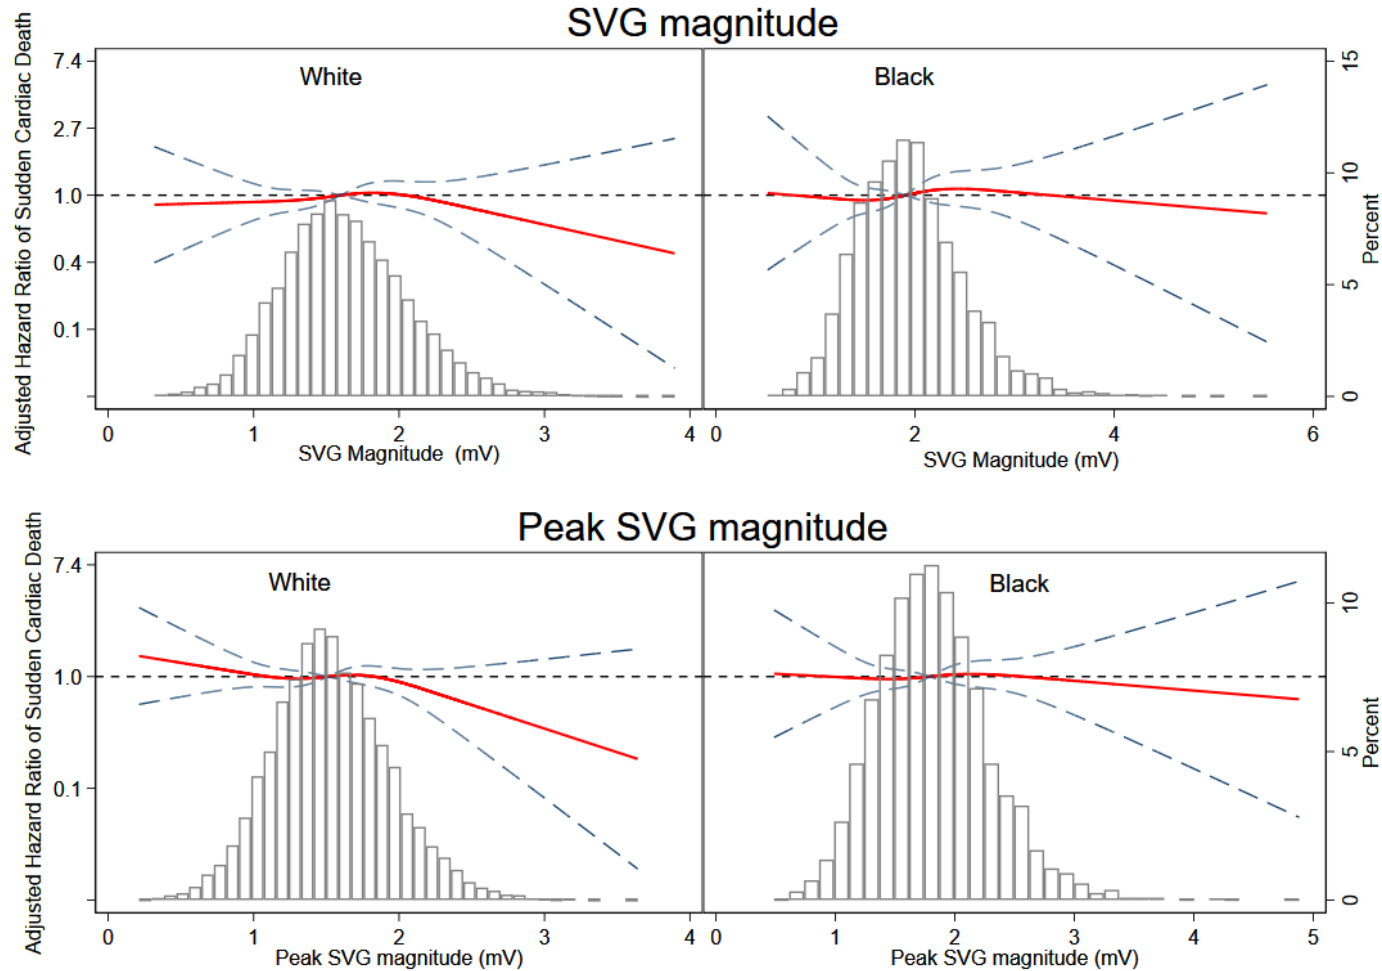

Supplement: JAH3-9-e015012-s001.pdf [file JAH3-9-e015012-s001.pdf]
